# Supplementary material for: Garlic-derived exosome-like nanovesicles alleviate dextran sulphate sodium-induced mouse colitis via the TLR4/MyD88/NF-κB pathway and gut microbiota modulation
Source: Royal Society of Chemistry journal article supplement (doi:10.1039/d3fo01094e), 2023-01-01
Supplement: d3fo01094e1.pdf [file d3fo01094e1.pdf]

# Supplementary Information

## **Garlic-derived exosome-like nanovesicles alleviate dextran sulphate sodium-induced colitis in mice via TLR4/MyD88/NF- $\kappa$ B pathway and gut microbiota modulation**

Zhenzhu Zhu<sup>\*a</sup>, Liuyue Liao<sup>a</sup>, Mingwei Gao<sup>a</sup>, Qin Liu<sup>a</sup>

<sup>a</sup> College of Food Science and Engineering, Nanjing University of Finance and Economics, Collaborative Innovation Center for Modern Grain Circulation and Safety, Nanjing 210023, People's Republic of China

### **Supplemental materials and methods**

#### **Analysis of purity, size, and zeta potential of GENs**

The size and number of GENs (12.6 mg/mL) were measured by nanoparticle tracking analysis (NTA) on the Nanosight NS300 (Malvern Instruments, Malvern, UK). The hydrodynamic size and polydispersity index (PDI) of GENs were assessed by dynamic light scattering (DLS) on the Nano ZS (Malvern Instruments, Malvern, UK). Zeta potential of GENs was determined by electrophoretic light scattering on a Zetasizer Nano ZS (Malvern Instruments, Malvern, UK).

#### **Cellular uptake and cell viability assays**

Caco-2 cells were cultured in Dulbecco's modified eagle medium (DMEM, Gibco, Grand Island, NY, USA), supplemented with penicillin-streptomycin solution (Beijing Solarbio Science & Technology Co., Ltd., Beijing, China) and fetal bovine serum (20%, Gibco, Grand Island, NY, USA) at 37 °C in a humidified atmosphere containing 5%

25 CO<sub>2</sub>. Caco-2 cells were seeded in 6-well plates for 24 h. Before assay, GENs were  
26 labeled with PKH67 (Beijing Baiaolaibo Technology Co., Ltd, Beijing, China) for 15  
27 min at 37 °C and for 15 min at 4 °C. For uptake assay, Caco-2 cells seeded in φ15mm  
28 glass bottom dish (2×10<sup>5</sup> cells/plate) were incubated with PKH67-labeled GENs (20  
29 μg/mL) for 2, 4, and 6 h, respectively. Afterward, the cells were washed with PBS,  
30 cellular nuclei were stained with Hoechst 33342. Finally, cells were imaged using  
31 Eclipse C1 fluorescence microscopy (Nikon, Japan). The excitation wavelengths of  
32 PKH67 and Hoechst 33342 (Shanghai Byotime Biotechnology Co., Ltd., Shanghai,  
33 China) were set at 490 nm and 350 nm, respectively.

34 For cell viability assay, Caco-2 cells were seeded in 96-well plates at a density of  
35 5×10<sup>4</sup> cells/well for 48 h. Then, Caco-2 cells were treated with GENs (1, 10, 20, 40, 80  
36 μg/mL) with or without LPS (1 μg/mL) stimulation for 24 h. 3-(4,5-dimethylthiazol-2-  
37 yl)-2,5-diphenyl tetrazolium bromide (MTT, Shanghai Byotime Biotechnology Co.,  
38 Ltd., Shanghai, China) (20 μL) was added and incubated for 4 h. Next,  
39 dimethylsulfoxide (DMSO, 150 μL) was added to resolve the formazan. The optical  
40 density (OD) value at 490 nm was measured by using an ELISA microplate reader  
41 (SpectraMax M2, USA) after shaking for 15 min. The cell viability was calculated by  
42 the formula: cell viability rate (%) = (OD<sub>490, drug</sub> - OD<sub>490, blank</sub>)/(OD<sub>490, control</sub> - OD<sub>490,</sub>  
43 blank)×100%.

#### 44 **Lucifer yellow (LY) assay**

45 Caco-2 cells were treated with GENs (0, 1, 5, 10 μg/mL) and LPS (1 μg/mL) for  
46 24 h. LY was added to the apical chambers, and the mixture was incubated for 2 h. The  
47 culture media from the basolateral chambers were then collected, and the fluorescence  
48 intensity of samples was measured by using a multifunctional microplate reader. The  
49 excitation and emission wavelengths of LY were set at 428 nm and 540 nm,

50 respectively. Apparent permeability coefficient (Papp) in the Caco-2 monolayer cells  
51 was calculated as previously reported.<sup>1</sup>

52

### 53 Supplemental Figures and Tables

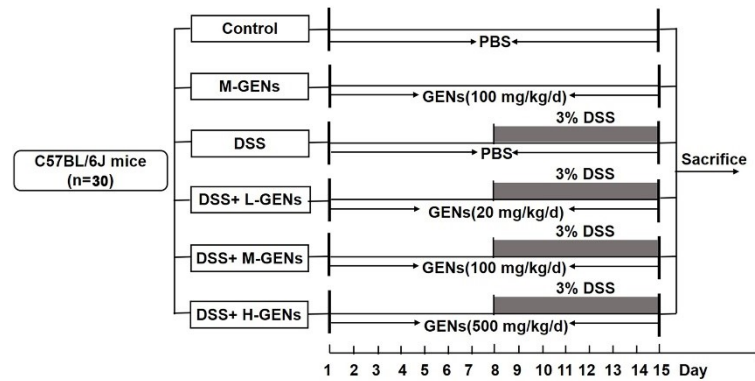

54

55 **Fig. S1** The establishment of DSS-induced mice colitis model and the administration  
56 strategy of GENs (20, 100, 500 mg/kg).

57

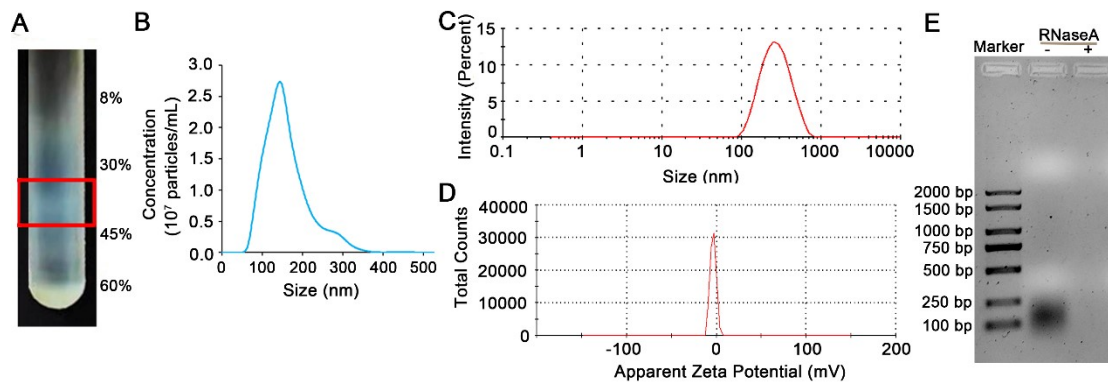

58

59 **Fig. S2** Characterization of GENs. (A) Suspension of GENs in the sucrose gradients  
60 (30-45%) after ultracentrifugation. (B) The size distribution, (C) hydration diameter  
61 distribution, and (D) zeta potential of GENs. (E) Agarose gel of total RNAs.

62

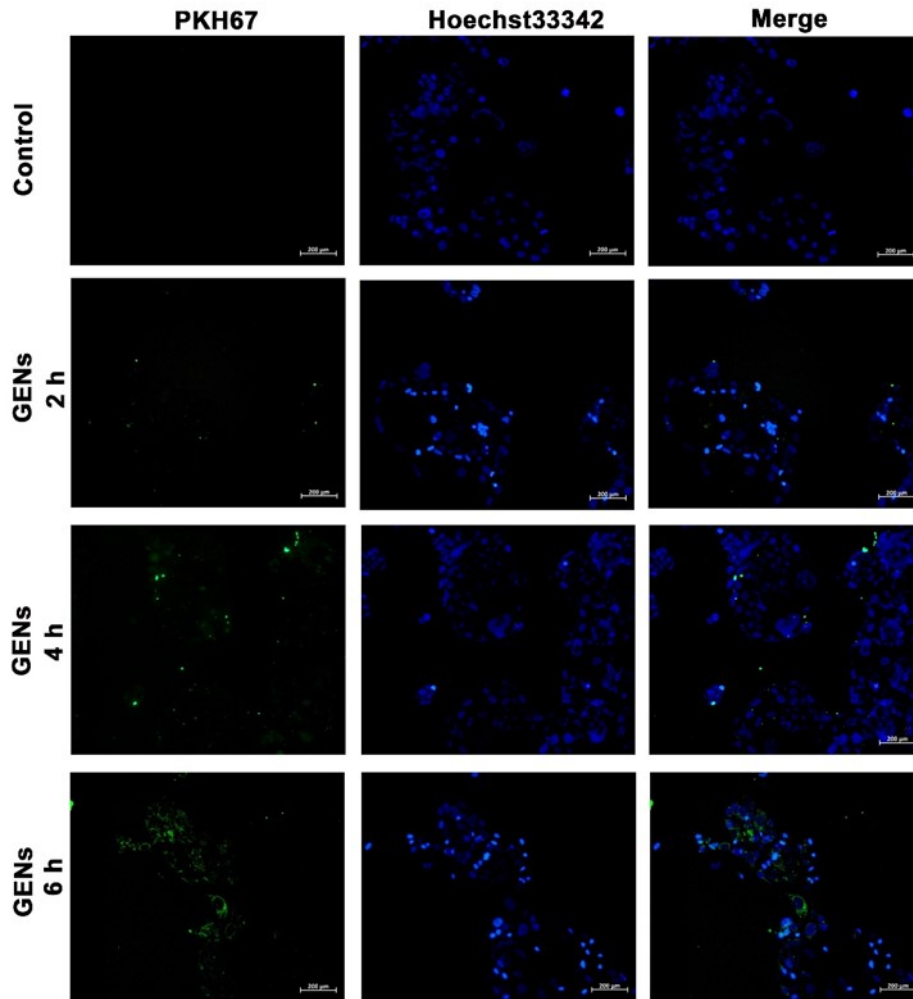

63

64 **Fig. S3** Cellular uptake of GENs (20  $\mu\text{g/mL}$ ) labeled by PKH67 (green) after co-  
 65 incubating with Caco-2 cells for 2, 4, 6 h at 37 °C. The nuclei were labeled by Hoechst  
 66 33342 (blue), the scale bar was 200  $\mu\text{m}$ .

67

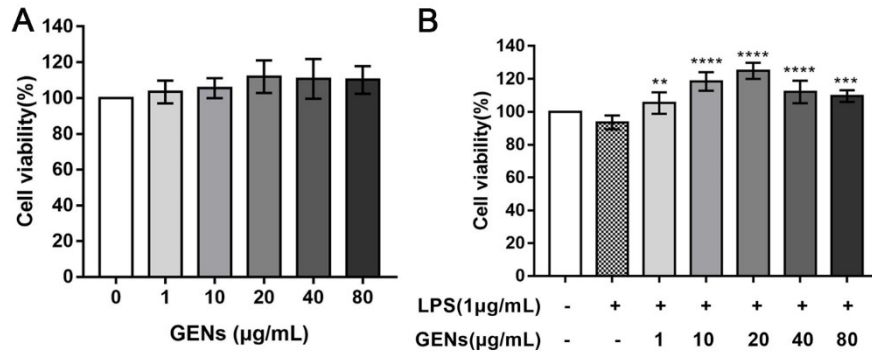

68

69 **Fig. S4** The cell viability of Caco-2 cells after GENS treatment with or without LPS (1  
 70 µg/mL) stimulation. \*\* $p < 0.01$ , \*\*\* $p < 0.001$ , \*\*\*\* $p < 0.0001$ , GENS group vs LPS group.

71

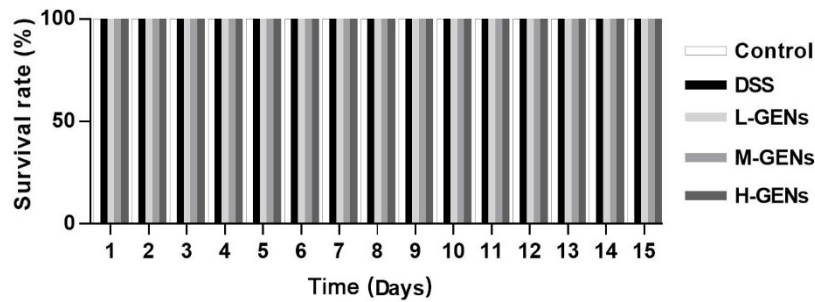

72

73 **Fig. S5** Survival rate of C57BL/6J mice in the control, DSS, L-GENs, M-GENs, and  
 74 H-GENs groups.

75

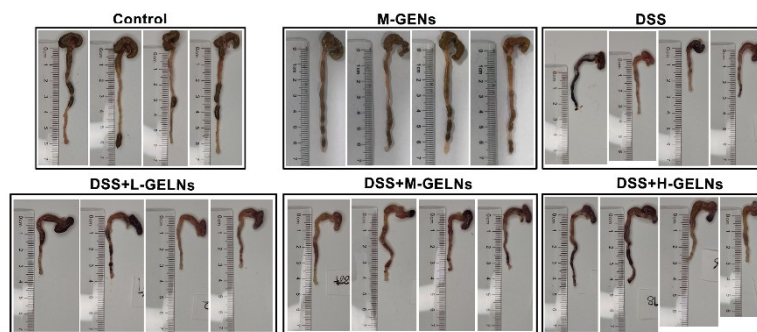

76

77 **Fig. S6** Photos of colon tissues in the normal mice (control), M-GENs treated C57BL/6J  
 78 mice at the 15<sup>th</sup> day, DSS treated C57BL/6J mice, DSS + L-GENs treated, DSS + M-  
 79 GENs treated and DSS + H-GENs treated mice at the 15<sup>th</sup> day. The length of colon  
 80 tissue was measured by a rule.

81

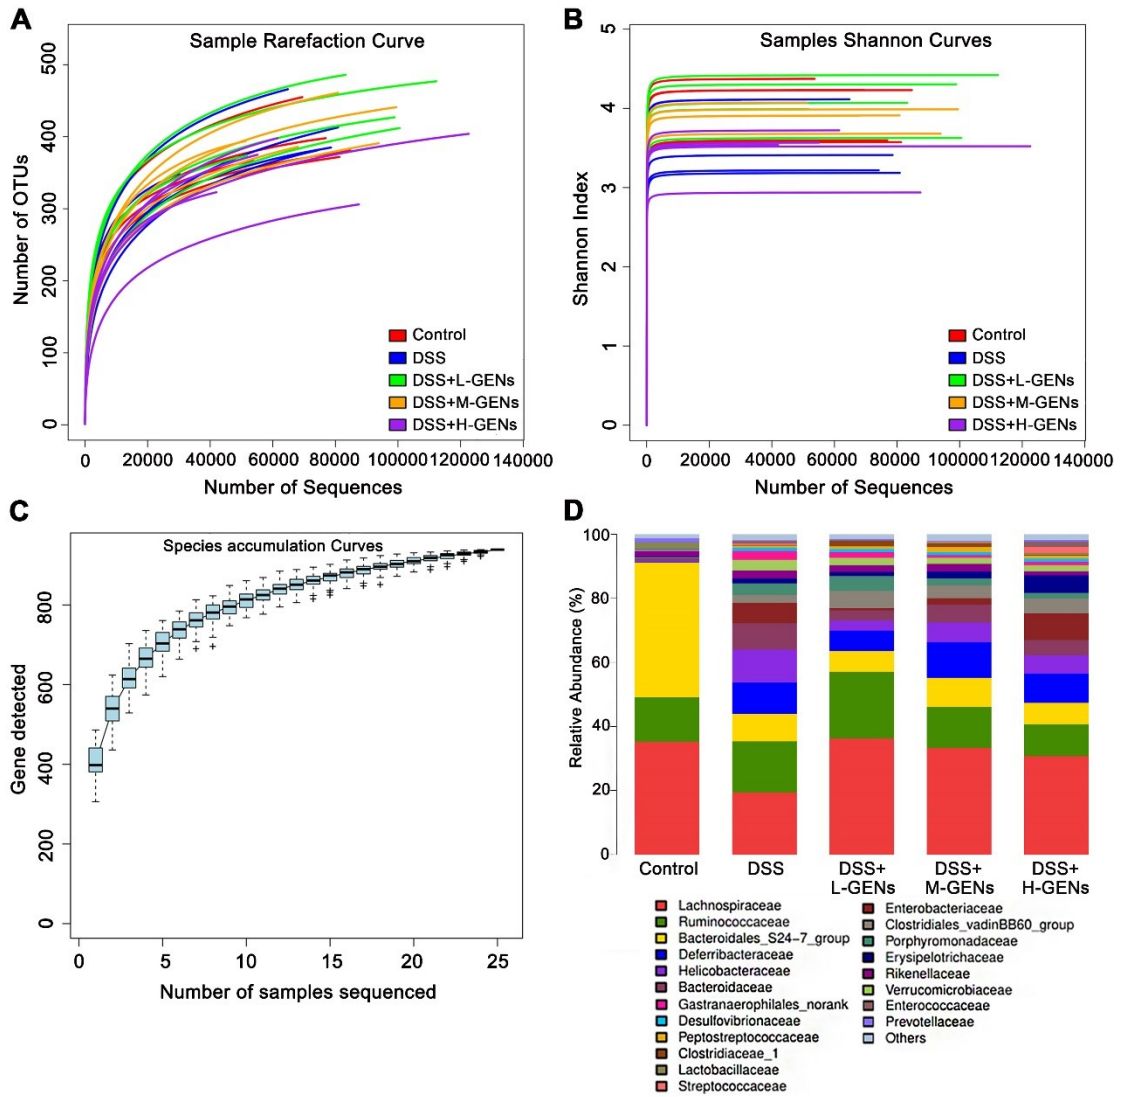

82

83 **Fig. S7** The rarefaction curve (A), Shannon curve (B) and species accumulation curve

84 (C) of cecal contents, the relative quantitation of domain bacteria at the family level

85 (D).

86

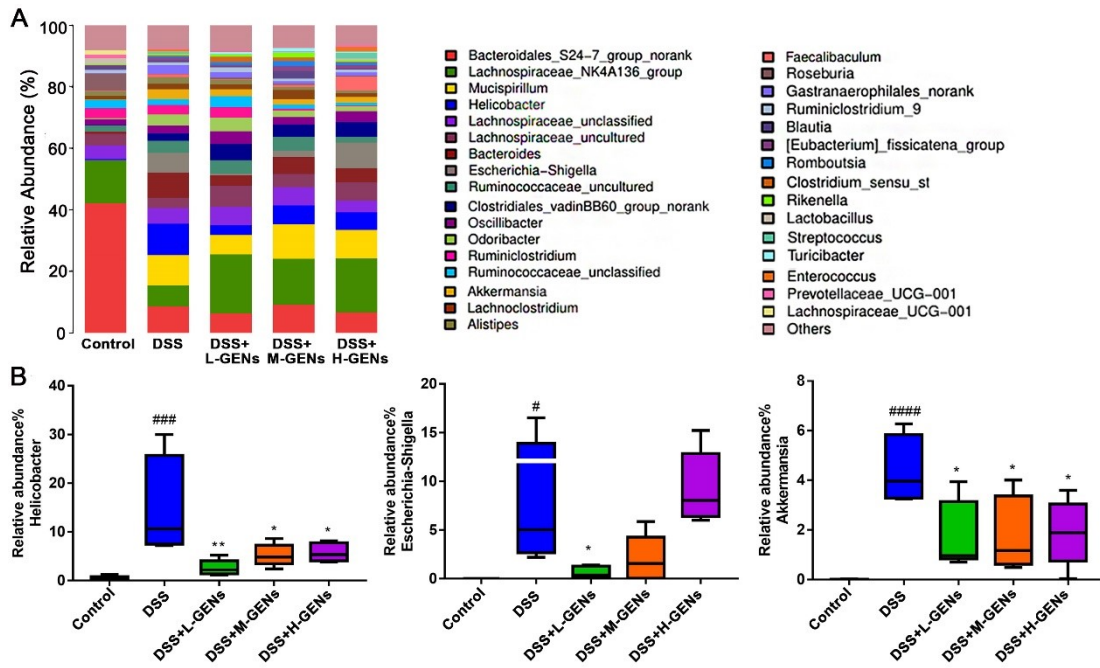

87

88 **Fig. S8** (A) Distribution of gut microbiota at the genus level. (B) The relative  
 89 abundance of *Helicobacter*, *Escherichia-Shigella* and *Akkermansia*. # $p < 0.05$ ,  
 90 #### $p < 0.001$ , ##### $p < 0.0001$ , DSS group vs control; \* $p < 0.05$ , \*\* $p < 0.01$ , DSS + GENs group  
 91 vs DSS group.

92

# Cladogram

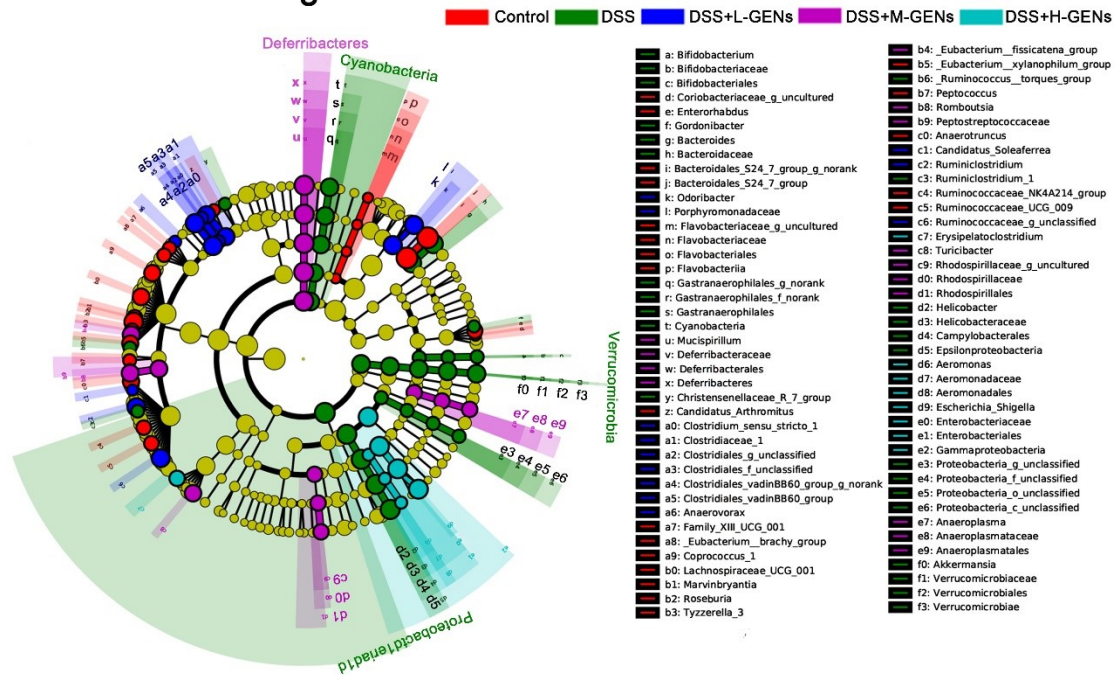

93

94 **Fig. S9** Taxonomic cladogram of the main different microbiota by linear discriminant  
 95 analysis effect size (LEfSe). Control group (red), DSS group (green blue), DSS + L-  
 96 GENs group (blue), DSS + M-GENs group (purple) and DSS + H-GENs group (cyan).  
 97 Yellow color represented that the taxa having no significant difference.

98



**Table S1.** Disease activity index (DAI)<sup>2</sup>

| <b>Score</b> | <b>Weight loss (%)</b> | <b>Bloody stools</b> | <b>Stool consistency</b> |
|--------------|------------------------|----------------------|--------------------------|
| 0            | None                   | Normal               | None                     |
| 1            | 1-5                    | -                    | -                        |
| 2            | 5-10                   | Soft and shaped      | Slight bleeding          |
| 3            | 10-15                  | -                    | -                        |
| 4            | >15                    | Diarrhea             | Gross bleeding           |

**Table S2.** Histopathology grading system for colonic sections<sup>3</sup>

| <b>Feature graded</b>      | <b>Grade</b> | <b>Description</b>                                                                                                                    |
|----------------------------|--------------|---------------------------------------------------------------------------------------------------------------------------------------|
| inflammation               | 0            | normal                                                                                                                                |
|                            | 1            | minimal infiltration of lamina propria, focal to multifocal                                                                           |
|                            | 2            | mild infiltration of lamina propria, multifocal, mild gland separation                                                                |
|                            | 3            | moderate to mixed infiltration, multifocal with minimal edema                                                                         |
|                            | 4            | marked mixed infiltration into submucosa and lamina propria with extensive areas of gland separation, enlarged Peyer's patches, edema |
| epithelium                 | 0            | normal                                                                                                                                |
|                            | 1            | minimal: focal mucosal hyperplasia                                                                                                    |
|                            | 2            | mild: multifocal tufting of rafts of epithelial cells with increased numbers of goblet cells                                          |
|                            | 3            | moderate: multifocal to locally extensive epithelial attenuation or erosion with goblet cell hyperplasia                              |
|                            | 4            | marked: locally extensive to subtotal erosion or ulceration                                                                           |
| glands                     | 0            | normal                                                                                                                                |
|                            | 1            | minimal: rare gland dilatation                                                                                                        |
|                            | 2            | mild: multifocal gland dilatation                                                                                                     |
|                            | 3            | moderate: multifocal gland dilatation with abscessation and occasional loss of glands                                                 |
|                            | 4            | marked: multifocal gland dilatation with abscessation and occasional loss of glands                                                   |
| depth of lesion            | 0            | none                                                                                                                                  |
|                            | 1            | mucosa                                                                                                                                |
|                            | 2            | mucosa and submucosa                                                                                                                  |
|                            | 3            | transmural                                                                                                                            |
| extent of section affected | 0            | none                                                                                                                                  |
|                            | 1            | minimal: <10%                                                                                                                         |
|                            | 2            | mild: 10–25%                                                                                                                          |
|                            | 3            | moderate: 26–50%                                                                                                                      |
|                            | 4            | marked: >50%                                                                                                                          |

103

**Table S3.** Primer sequences used for RT-qPCR<sup>4</sup>

| <b>Gene</b>             | <b>Primer sequence (5'-3')</b> |
|-------------------------|--------------------------------|
| <i>β</i> -actin-Forward | TCAGCAAGCAGGAGTACGATG          |
| <i>β</i> -actin-Reverse | AACGCAGCTCAGTAACAGTCC          |
| TLR4-Forward            | ACTTCCATCCAGTTGCCTTCTTGG       |
| TLR4-Reverse            | TTAAGCCTCCGACTTGTGAAGTGG       |
| MyD88-Forward           | TCTCGGACTCCTGGTTCTGCTG         |
| MyD88-Reverse           | TCTCGGACTCCTGGTTCTGCTG         |

104

105 **Table S4.** Basic parameters of garlic-derived exosome-like nanovesicles

| <b>Parameters (unit)</b>               | <b>Value</b>                  | <b>Method</b> |
|----------------------------------------|-------------------------------|---------------|
| Yield (p/mL)                           | $(2.86 \pm 0.15) \times 10^9$ | NTA           |
| Particle-to-protein ratio (p/ $\mu$ g) | $(8.17 \pm 0.43) \times 10^7$ | -             |
| Particle size/nm                       | $160.20 \pm 3.50$             | NTA           |
| Hydration diameter/nm                  | $229.33 \pm 3.26$             | DLS           |
| Zeta/mV                                | $-10.07 \pm 0.78$             | -             |
| PDI                                    | $0.21 \pm 0.00$               | -             |

106

107 **Table S5.** The class and percentage of lipids in garlic-derived exosome-like  
 108 nanovesicles by the lipidomic analysis.

| <b>No.</b> | <b>Class</b>                    | <b>Abbreviation</b> | <b>Percentage/%</b> |
|------------|---------------------------------|---------------------|---------------------|
| 1          | phosphatidylcholine             | PC                  | 27.6780             |
| 2          | acyl hexosyl sitosterol ester   | AcHexSiE            | 16.2776             |
| 3          | sphingosine                     | SPH                 | 15.2774             |
| 4          | triglyceride                    | TG                  | 10.3309             |
| 5          | ceramide                        | Cer                 | 6.5079              |
| 6          | phosphatidylethanolamine        | PE                  | 5.9138              |
| 7          | wax ester                       | WE                  | 4.1815              |
| 8          | diacylglycerol                  | DG                  | 3.9531              |
| 9          | phosphatidylethanol             | PEt                 | 2.5091              |
| 10         | acyl hexosyl campesterol ester  | AcHexCmE            | 2.2218              |
| 11         | acyl hexosyl stigmasterol ester | AcHexStE            | 1.3953              |
| 12         | Hexosylceramide                 | Hex1Cer             | 0.7897              |
| 13         | acyl hexosyl zymosterol ester   | AcHexZyE            | 0.4791              |
| 14         | monoglyceride                   | MG                  | 0.4393              |
| 15         | phospholipids alcohol           | PA                  | 0.4190              |
| 16         | acyl hexosyl cholesterol ester  | AcHexChE            | 0.2632              |
| 17         | lysophosphatidylcholine         | LPC                 | 0.2521              |
| 18         | phosphatidylglycerol            | PG                  | 0.2481              |
| 19         | (O-acyl)-1-hydroxy fatty acid   | OAHFA               | 0.2354              |
| 20         | monogalactosyldiacylglycerol    | MGDG                | 0.1686              |
| 21         | phosphatidylinositol            | PI                  | 0.1355              |
| 22         | phosphatidylserine              | PS                  | 0.1070              |
| 23         | lysophosphatidylethanolamine    | LPE                 | 0.0762              |
| 24         | digalactosyldiacylglycerol      | DGDG                | 0.0699              |
| 25         | N-Acylethanolamine              | AEA                 | 0.0387              |
| 26         | lysobisphosphatidic acid        | LBPA                | 0.0319              |

109 **Table S6.** The affiliation of proteins in garlic-derived exosome-like nanovesicles by  
 110 the proteomic analysis.

| No. | Identified Proteins                                                                   | Protein Existence <sup>a</sup> | Accession Number | Molecular Weight |
|-----|---------------------------------------------------------------------------------------|--------------------------------|------------------|------------------|
| 1   | Acetolactate synthase                                                                 | 2                              | A0A3S7QFS2_ALLFI | 71 KDa           |
| 2   | Adenosylhomocysteinase (Fragment)                                                     | 2                              | Q9SDP1_ALLCE     | 34 KDa           |
| 3   | Aldehyde dehydrogenase (Fragment)                                                     | 2                              | Q8RVW3_ALLCE     | 30 KDa           |
| 4   | Alliinase (Fragment)                                                                  | 3                              | Q9SW86_ALLSA     | 33 KDa           |
| 5   | Alliinase                                                                             | 2                              | A0A3G2I868_ALLPO | 55 KDa           |
| 6   | Aquaporin 1                                                                           | 2                              | Q9M4T0_ALLCE     | 31 KDa           |
| 7   | Aquaporin 2                                                                           | 2                              | Q9M4S9_ALLCE     | 31 KDa           |
| 8   | Aquaporin plasma in insic protein 1                                                   | 2                              | A0A0D4CZJ2_ALLSA | 31 KDa           |
| 9   | Aquaporin plasma in insic protein 2                                                   | 2                              | A0A0D4CZX5_ALLSA | 31 KDa           |
| 10  | Aquaporin plasma in insic protein 3                                                   | 2                              | A0A0D4CYY1_ALLSA | 31 KDa           |
| 11  | ATP synthase subunit alpha (Fragment)                                                 | 3                              | A1XIV0_ALLCE     | 46 KDa           |
| 12  | ATP synthase subunit beta chloroplastic                                               | 3                              | A0A6B9VW32_9ASPA | 54 KDa           |
| 13  | ATP-dependent Clp protease proteolytic subunit                                        | 3                              | A0A6B9VXS4_9ASPA | 23 KDa           |
| 14  | Beta-actin                                                                            | 2                              | A0A345F2T1_ALLCE | 42 KDa           |
| 15  | Bifunctional 6(G)-fructosyltransferase/2 1-fructan:2 1-fructan 1-fructosyltransferase | 1                              | P92916 GFT_ALLCE | 69 KDa           |
| 16  | Cell division cycle protein 48 homolog                                                | 2                              | G5EIQ1_ALLCE     | 90 KDa           |
| 17  | Cysteine synthase                                                                     | 2                              | Q9MAZ2_ALLTU     | 34 KDa           |
| 18  | Cysteine synthase                                                                     | 2                              | Q3L195_ALLSA     | 36 KDa           |
| 19  | Cytochrome oxidase subunitII (Fragment)                                               | 4                              | A0A059XHT2_9ASPA | 10 KDa           |
| 20  | Defensin 3                                                                            | 2                              | A0A7D5T120_ALLSA | 8 KDa            |
| 21  | Defensin 5                                                                            | 2                              | A0A7D5NM87_ALLCE | 9 KDa            |

| No. | Identified Proteins                                       | Protein Existence <sup>a</sup> | Accession Number   | Molecular Weight |
|-----|-----------------------------------------------------------|--------------------------------|--------------------|------------------|
| 22  | Defensin 5                                                | 4                              | A0A7D5NXX8_ALLCE   | 9 KDa            |
| 23  | DnaJ protein homolog                                      | 2                              | P42824 DNJH2_ALLPO | 47 KDa           |
| 24  | Farnesyl diphosphate synthase                             | 2                              | F6KIJ4_ALLSA       | 40 KDa           |
| 25  | Flavonoid glucosyl-transferase                            | 2                              | Q7XJ49_ALLCE       | 53 KDa           |
| 26  | Glutamate--cysteine ligase                                | 2                              | Q8W1X9_ALLCE       | 56 KDa           |
| 27  | Glutathione transferase                                   | 2                              | A4PIV6_ALLCE       | 24 KDa           |
| 28  | Glutathione-S-transferase                                 | 2                              | A0A5J6YHL6_ALLSA   | 26 KDa           |
| 29  | Glyceraldehyde-3-phosphate dehydrogenase (Fragment)       | 3                              | D2KCI8_ALLSC       | 19 KDa           |
| 30  | Glyceraldehyde-3-phosphate dehydrogenase (Fragment)       | 3                              | A0A076V7J0_ALLCE   | 21 KDa           |
| 31  | Glyceraldehyde-3-phosphate dehydrogenase GAPC2 (Fragment) | 3                              | A0A2S1IZX9_ALLPO   | 21 KDa           |
| 32  | Glyoxalase                                                | 2                              | F2ZC02_ALLCE       | 33 KDa           |
| 33  | GTP-Binding Nuclear Protein Ran-2                         | 2                              | A9X4K0_ALLSA       | 25 KDa           |
| 34  | Heat shock protein 70 homologue (Fragment)                | 2                              | Q43372_ALLCE       | 15 KDa           |
| 35  | Heat shock protein 70                                     | 2                              | H2CLX1_ALLSA       | 40 KDa           |
| 36  | Histone H4 (Fragment)                                     | 2                              | Q38686_ALLCE       | 7 KDa            |
| 37  | I lectin (Fragment)                                       | 1                              | Q38789_ALLSA       | 33 KDa           |
| 38  | II lectin (Fragment)                                      | 1                              | Q38783_ALLSA       | 17 KDa           |
| 39  | Lectin (Fragment)                                         | 4                              | K4P0T2_ALLSA       | 32 KDa           |
| 40  | Lactoylglutathione lyase                                  | 2                              | F5HSC6_ALLCE       | 21 KDa           |
| 41  | Late embryogenesis abundant protein lea14-a               | 2                              | H2CLX2_ALLSA       | 17 KDa           |
| 42  | Lipoxygenase                                              | 2                              | A0A1J0I8W4_ALLCE   | 99 KDa           |
| 43  | Molecular chaperone DjA2                                  | 2                              | Q0GLI7_ALLPO       | 47 KDa           |
| 44  | Peptidylprolyl cis-trans isomerase                        | 2                              | P34887 CYPH_ALLCE  | 16 KDa           |
| 45  | Peroxidase ATP17a-like protein                            | 2                              | H2CLX6_ALLSA       | 21 KDa           |
| 46  | Phospholipase D alpha (Fragment)                          | 2                              | C7SAX4_ALLPO       | 21 KDa           |
| 47  | Proteasome subunit alpha-3 (Fragment)                     | 2                              | Q6U835_ALLSA       | 16 KDa           |
| 48  | Protein TIC 214                                           | 3                              | A0A4Y5X071_9ASPA   | 210 KDa          |

| No. | Identified Proteins                                          | Protein Existence <sup>a</sup> | Accession Number | Molecular Weight |
|-----|--------------------------------------------------------------|--------------------------------|------------------|------------------|
| 49  | Putative cold-regulated protein                              | 2                              | H2CLX4_ALLSA     | 26 KDa           |
| 50  | Putative progesterone 5-beta-reductase                       | 2                              | A0A0M4BW04_ALLUR | 44 KDa           |
| 51  | Sucrose:sucrose 1-fructosyl transferase 1-SST                | 2                              | A0A125SXW5_ALLCE | 70 KDa           |
| 52  | Sucrose:sucrose 1-fructosyl transferase 1-SST                | 2                              | Q8LPM7_ALLSA     | 70 KDa           |
| 53  | Sucrose-phosphate synthase (Fragment)                        | 2                              | A8IK45_ALLCE     | 114 KDa          |
| 54  | Superoxide dismutase (Fragment)                              | 2                              | D2Y1A6_ALLSA     | 15 KDa           |
| 55  | Tau glutathione S-transferase                                | 2                              | F2ZC01_ALLCE     | 26 KDa           |
| 56  | trypsin inhibitor                                            | 2                              | Q8RVY7_ALLCE     | 11 KDa           |
| 57  | Tubulin beta chain                                           | 2                              | A0A345F2T2_ALLCE | 50 KDa           |
| 58  | Uncharacterized protein                                      | 2                              | H2CLX8_ALLSA     | 22 KDa           |
| 59  | Unspecific 9/13 divinyl ether synthase                       | 2                              | Q2WE96_ALLSA     | 53 KDa           |
| 60  | Vacuolar H <sup>+</sup> -ATPase catalytic subunit (Fragment) | 2                              | Q9SDP0_ALLCE     | 20 KDa           |
| 61  | Vacuolar H <sup>+</sup> -ATPase catalytic subunit (Fragment) | 2                              | Q9SDM0_ALLCE     | 22 KDa           |

111 <sup>a</sup> Protein Existence. 1. Experimental evidence at protein level; 2. Experimental evidence at tran  
112 level; 3. Protein inferred from homology; 4. Protein predicted; 5. Protein uncertain. The raw file  
113 was submitted to the established database by using the PEAKS Studio 8.5 software, and the  
114 whole Allium of UniProt database was used for comparative search  
115 (<https://www.uniprot.org/taxonomy/4678>). The filter parameters of result: Peptide FDR $\geq$ 1%,  
116 unique peptide $\geq$ 1.

117

118 **Table S7.** The name, sequence and reads count of miRNAs in garlic-derived exosome-  
 119 like nanovesicles by microRNA sequencing<sup>a</sup>.

| No. | Name           | Sequence               | Reads Count |
|-----|----------------|------------------------|-------------|
| 1   | han-miR3630-5p | GCAAGUGAUGAAGAACCA     | 16717       |
| 2   | aof-miR166a    | UCUCGGACCAGGCUUCAUUC   | 971         |
| 3   | ata-miR166c-3p | UCGGACCAGGCUUCAUUCU    | 748         |
| 4   | sly-miR166c-3p | UCGGACCAGGCUUCAUUCUC   | 684         |
| 5   | ppt-miR894     | UUCACGUCGGGUUCACCA     | 451         |
| 6   | aof-miR159     | UUUGGAUUGAAGGGAGCUCU   | 981         |
| 7   | aof-miR396a    | UUCCACGGCUUUCUUGAACUG  | 385         |
| 8   | aof-miR166d    | UCGGACCAGGCUUCAUUC     | 165         |
| 9   | aof-miR394     | UUGGCAUUCUGUCCACCUCC   | 85          |
| 10  | aof-miR396b    | UUCCACAGCUUUCUUGAACUG  | 75          |
| 11  | sly-miR168a-3p | CCUGCCUUGCAUCAACUGAAU  | 75          |
| 12  | aof-miR390     | AAGCUCAGGAGGGAUAGCGCC  | 40          |
| 13  | aof-miR167b    | UGAAGCUGCCAGCAUGAUCUGA | 37          |
| 14  | aof-miR166b    | UCUCGGACCAGGCUUCAUUC   | 69          |
| 15  | gma-miR482d-3p | UCUUCCCUACACCUCCAUACC  | 31          |
| 16  | eun-miR482a-3p | UCUUGCCAAUACCACCCAUGCC | 28          |
| 17  | lja-miR171c    | UGAGCCGAAUCAAAUUCACUU  | 26          |
| 18  | aof-miR536     | UCGUGCCACGCUGUGUGCGUC  | 14          |
| 19  | mes-miR156k    | UUGACAGAAGAGAGAGAGCAC  | 11          |
| 20  | aof-miR535     | UGACAACGAGAGAGAGCACGC  | 12          |
| 21  | cas-miR394     | UUUGGCAUUCUGUCCACCUCC  | 9           |
| 22  | aof-miR319a    | UUGGACUGAAGGGAGCUCCU   | 22          |
| 23  | tae-miR9777    | AGCAACUUAUCUGAGCAC     | 9           |
| 24  | cas-miR159b-3p | UUUGGAUUGAAGGGAGCUCUU  | 7           |
| 25  | gso-miR1510a   | UGUUGUUUUACCUAUUCCACC  | 12          |
| 26  | aof-miR827     | UUAGAUGGCCAUCAACAAACA  | 7           |



| No. | Name            | Sequence               | Reads Count |
|-----|-----------------|------------------------|-------------|
| 27  | gso-miR3522b    | UGAGACCAAUGAGCAGCUGA   | 6           |
| 28  | lja-miR1511-3p  | AACCAGGCUCUGAUACCAUGA  | 7           |
| 29  | aof-miR164      | UGGAGAAGCAGGGCACGUGCA  | 8           |
| 30  | vun-miR2118     | UUGCCGAUUCCACCCAUCCU   | 7           |
| 31  | bra-miR158-3p   | UUUCCAAAUGUAGACAAAGCA  | 8           |
| 32  | gma-miR1510b-5p | AGGGAUAGGUAAAACAACU    | 8           |
| 33  | aof-miR167c     | UGAAGCUGCCAGCAUGAUCU   | 8           |
| 34  | csi-miR166f-3p  | UCGGACCAGGCUUCAUCCCU   | 5           |
| 35  | bdi-miR7717c-3p | GUUAGUGAUGAGAAUAG      | 5           |
| 36  | gso-miR1507b    | UCUCAUCCAUAACAUCGUCUGA | 6           |
| 37  | csi-miR1515b-5p | UCAUUUUUGCGUGCAGUGAUCC | 5           |
| 38  | pab-miR11407a   | AAACUCUGACGGCGCAAC     | 5           |
| 39  | aof-miR319b     | UUUGGACUGAAGGGAGCU     | 12          |
| 40  | gma-miR2109-3p  | GGAGGCGUAGAUACUCACACC  | 4           |
| 41  | gma-miR1513b    | UGAGAGAAAGCCAUGACUUAC  | 4           |
| 42  | pab-miR156w     | UUGACAGAAGAUAGAGGGCAC  | 5           |
| 43  | cas-miR166a     | GGA AUGUUGUCUGGCUCGU   | 8           |
| 44  | cas-miR159a     | UUUGGAUUGAAGGGAGCUCC   | 4           |
| 45  | aqc-miR159      | UUUGGACUGAAGGGAGCUCU   | 5           |
| 46  | aof-miR168a     | UUCGCUUGGUGCAGGUCGGGA  | 7           |
| 47  | csi-miR393b-5p  | UCCAAAGGGAUCGCAUUGAUC  | 3           |
| 48  | aof-miR156a     | UGACAGAAGAGAGUGAGCAC   | 5           |
| 49  | pab-miR396t     | UCCACGGCUUUCUUGAACUU   | 3           |
| 50  | aof-miR160c     | UGCCUGGCUCCUGUAUGCCA   | 4           |
| 51  | vca-miR167b-3p  | AGAUCAUGUUGCAGUUUCAUC  | 4           |
| 52  | gma-miR4412-5p  | UGUUGCGGGUAUCUUUGCCUC  | 4           |
| 53  | eun-miR482b-3p  | UUUCCUAUUCUCCCAUCCA    | 3           |
| 54  | aof-miR171c     | UUGAGCCGCGUCAAUUUCUC   | 7           |

| No. | Name            | Sequence                  | Reads Count |
|-----|-----------------|---------------------------|-------------|
| 55  | osa-miR444c.1   | UGUCUCAAGCUUGCUGCCU       | 4           |
| 56  | gma-miR5372     | UUGUUCGAUAAAACUGUUGUG     | 3           |
| 57  | osa-miR5807     | GGGCUGGGGUUAUGUGGC        | 3           |
| 58  | cas-miR858      | UUCAUUGUCUGUUCGACCU       | 2           |
| 59  | bra-miR168a-3p  | CCCGCCUUGUGUCAAGUGAAU     | 2           |
| 60  | aly-miR4226     | ACAACAUGAUCGAGCAAU        | 2           |
| 61  | pab-miR396a-5p  | UUCCACAGCUUUCUUGAACUA     | 2           |
| 62  | bdi-miR166e-3p  | CUCGGACCAGGCUUCAUUCCC     | 2           |
| 63  | eun-miR482c-5p  | GAGAUUCGAGCUACCGGAAGUCGUG | 2           |
| 64  | gso-miR2109     | UGCGAGUGUCUUCGCCUCUGA     | 3           |
| 65  | stu-miR1886g-5p | GAUGGACAAGGUUUGGACA       | 2           |
| 66  | csi-miR396f-5p  | UUCCACAGCUUUCUUGAACUU     | 2           |
| 67  | gso-miR1509a    | UUAUCAAGGAAAUCACGGUCG     | 1           |
| 68  | gma-miR1510a-3p | UGUUGUUUUACCUAUUCCACCC    | 2           |
| 69  | gma-miR319q     | UGGACUGAAGGGAGCUCCUUC     | 1           |
| 70  | lus-miR159b     | UUUGGAUUGAAGGGAGCUCUC     | 2           |
| 71  | pvu-miR159a.2   | CUUCCAUAUCUGGGGAGCU       | 4           |
| 72  | sly-miR319c-3p  | UUGGACUGAAGGGAGCUCCUU     | 2           |
| 73  | mtr-miR166b     | UCGGACCAGGCUUCAUUCCUA     | 1           |
| 74  | ppt-miR166m     | UCGGACCAGGCAUCAUUCCUU     | 1           |
| 75  | ptc-miR166p     | UCGGACCAGGCUCCAUUCCUC     | 1           |
| 76  | cpa-miR167c     | UGAAGCUGCCAGCAUGAUCUU     | 1           |
| 77  | bra-miR168c-5p  | GCGCUUGGUGCAGGUCGGGAC     | 2           |
| 78  | bdi-miR169d     | UAGCCAAGAAUGACUUGCCUC     | 1           |
| 79  | lus-miR171j     | UGAUUGAGCCGCGUCAUAUC      | 2           |
| 80  | ppe-miR171d-5p  | CGUGAUUUUGGUUCGGUU        | 2           |
| 81  | zma-miR2275a-5p | GUUGGAGCAAAGCAAACC        | 1           |
| 82  | ppt-miR390c-3p  | CGCUGUCCGAUUUGAGCA        | 1           |

| No. | Name           | Sequence               | Reads Count |
|-----|----------------|------------------------|-------------|
| 83  | stu-miR399i-3p | UGCCAAAGGAGAGUUGCCCUA  | 1           |
| 84  | gra-miR482     | CUUCCAAUUCUCCCAUU      | 1           |
| 85  | gma-miR5380b   | GAAAAUGAAGAUGGAGGA     | 1           |
| 86  | sbi-miR5564a   | GGAAGAAUUUGUCGAACA     | 2           |
| 87  | gma-miR5670b   | CACAUCAUACCAUAUUUGCUUC | 1           |
| 88  | nta-miR6025d   | GAACAAUUGAAUACUCUA     | 1           |
| 89  | bdi-miR827-5p  | GUUUUGUUGGUUGCAUCU     | 1           |
| 90  | aof-miR12149   | GCUUCUUUGUCAUACUUCU    | 1           |
| 91  | aof-miR156b    | UUGACAGAAGAUAGAGAGCAC  | 1           |
| 92  | aof-miR166c    | UCGGACCAGGCUUCAUCCCC   | 1           |
| 93  | aof-miR168b    | UCGCUUGGUGCAGGUCGGG    | 2           |
| 94  | aof-miR171b    | UUGAGCCGCGCCAAUAUCACG  | 2           |
| 95  | aof-miR172     | AGAAUCUUGAUGAUGCUGCAUU | 2           |
| 96  | ath-miR8175    | UCCUGGCAACGGCGCCA      | 1           |
| 97  | bdi-miR5057    | AUUUCAAUUCGUUUGACA     | 1           |
| 98  | bdi-miR845     | GCUCUGAUACCAAUUGUU     | 1           |
| 99  | bra-miR5721    | AAAAAAGGAGUGAGAAUGGA   | 1           |
| 100 | cas-miR166f-3p | UCGGACCAGGCUUCAUCCCCU  | 1           |
| 101 | cme-miR854     | UGAGGAUGAGGAGGAGGA     | 2           |
| 102 | csi-miR159c-3p | CUUGGACUGAAUGGAGCUCCC  | 1           |
| 103 | csi-miR169r-5p | CAGCCAAGGAUGACUUGCC    | 2           |
| 104 | csi-miR171f-5p | UAUUGGCCUGGUUCACUCAGA  | 1           |
| 105 | csi-miR395c-3p | CUGAAGUGUUUGGGGAACUC   | 1           |
| 106 | eun-miR167c-3p | GAUCAUGUGGCUGCUUCACC   | 1           |
| 107 | eun-miR482a-5p | CAUGGGUCGUUUGGUGAGA    | 1           |
| 108 | fve-miR1511    | CUAGCUCUGAUACCAUGU     | 1           |
| 109 | fve-miR156e    | UUGACAGAAGAGAGUGAGCAC  | 2           |
| 110 | fve-miR159b    | AUUGGAUUGAAGGGAGCUCU   | 1           |

| No. | Name             | Sequence              | Reads Count |
|-----|------------------|-----------------------|-------------|
| 111 | fve-miR162-3p    | UCGAUAAAACUCUGCAUCCAG | 1           |
| 112 | fve-miR2109      | GUGCAGUGUCUUACUCUG    | 1           |
| 113 | fve-miR530       | UGCAUUUGCACCUGCACCU   | 1           |
| 114 | gma-miR399k      | UGCCAAAGGAGAUUUGCCCUG | 1           |
| 115 | gma-miR4994-3p   | GACAUCCUUGAGUAAACA    | 2           |
| 116 | gma-miR5772      | AGAAGUCAGUUAGAGGAG    | 1           |
| 117 | lja-miR166-3p    | CUUCGGACCAGGCUUCAUUC  | 1           |
| 118 | mtr-miR5247      | CAGGAGCAAAGCAUCUGA    | 1           |
| 119 | mtr-miR5740      | GAAAGAAGAACAUUUGGA    | 1           |
| 120 | pab-miR11569     | UGCUCUAUGUCAUGGAUC    | 1           |
| 121 | pab-miR162a      | UCGAUAAACCUCUGCAUCCGG | 2           |
| 122 | pab-miR164a      | CACGUGCUCCCCUUCUCC    | 1           |
| 123 | pab-miR858b      | UUCGUUGUCUGUUCGACCUUG | 1           |
| 124 | peu-miR2916      | GGGGCUCGAAGUCGAUCA    | 1           |
| 125 | sly-miR159b      | UUGGAAAGAGGUGCUCUA    | 1           |
| 126 | tae-miR9773      | UUUGUUUUUAUGUUUUUU    | 1           |
| 127 | vca-miR10202b-5p | AAUAAUCUGUUGGUCAAACC  | 2           |

120 <sup>a</sup> Filtered clean read from 18 nt to 36 nt in length and perform deduplication to obtain unique  
121 reads for subsequent analysis. The obtained unique reads were identified against known plant  
122 mature miRNAs in the miRBase22 database (<http://www.mirbase.org/>)<sup>5</sup> using the criterion of  
123 a maximum of two mismatches. Sequences that are not annotated with any information use  
124 mireap (v2.0) for new miRNA prediction analysis.

125

126 **Table S8.** MiRNAs that were predicted to target human genes related inflammatory  
 127 factors<sup>a</sup>

| <b>MiRNA</b>   | <b>Sequence</b>            | <b>Length<br/>(nt)</b> | <b>Predicted<br/>target gene</b>                                                                                    |
|----------------|----------------------------|------------------------|---------------------------------------------------------------------------------------------------------------------|
| han-miR3630-5p | GCAAGUGAUGAAGA<br>ACCA     | 18                     | TLR4, MyD88, NFKB1,<br>CHUK, claudin1, TJP1(ZO-<br>1), IL-17RA, IL6R, IFN- $\gamma$ , IL-<br>18, TNFAIP8, TNFAIP8L1 |
| sly-miR168a-3p | CCUGCCUUGCAUCA<br>ACUGAAU  | 21                     | TLR4, TJP1(ZO-1), IL17A,<br>IL6R, TNFAIP8, TNFAIP2,<br>TNFAIP1                                                      |
| gso-miR1510a   | UGUUGUUUUACCUA<br>UUCCACC  | 21                     | TLR4, CHUK, IRAK3,<br>IRAK4                                                                                         |
| mes-miR156k    | UUGACAGAAGAGAG<br>AGAGCAC  | 21                     | TLR4, IL17RA, IL-1 $\beta$ ,<br>IRAK3                                                                               |
| bra-miR158-3p  | UUUCCAAAUGUAGA<br>CAAAGCA  | 21                     | TLR4, TJP1 (ZO-1), claudin1,<br>IL6R, TNFAIP8, TNFAIP6,<br>IRAK3                                                    |
| gma-miR482d-3p | UCUUCCCUACACCUC<br>CCAUACC | 22                     | TLR4, claudin 1, IL6R,<br>IL17RA, TNFAIP8,<br>TNFAIP3, IRAK4                                                        |
| aof-miR159     | UUUGGAUUGAAGGG<br>AGCUCU   | 20                     | TLR4, MyD88, CHUK,<br>claudin 1, TNFAIP8L3,<br>IRAK2                                                                |
| aof-miR167b    | UGAAGCUGCCAGCA<br>UGAUCUGA | 22                     | MyD88, IKKB, IL6R,<br>TNFAIP8, IFNGR2, IRAK3                                                                        |

128

129 **Table S8.** MiRNAs that were predicted to target human genes related inflammatory  
 130 factors<sup>a</sup> (Continued)

| <b>MiRNA</b>    | <b>Sequence</b>            | <b>Length<br/>(nt)</b> | <b>Predicted<br/>target gene</b>                                |
|-----------------|----------------------------|------------------------|-----------------------------------------------------------------|
| aof-miR167c     | UGAAGCUGCCAGC<br>AUGAUCU   | 20                     | MyD88, IKBKB, occludin,<br>TNFAIP8, IRAK3                       |
| aof-miR390      | AAGCUCAGGAGGG<br>AUAGCGCC  | 21                     | TLR4, occludin, IL17RA, IL6R,<br>TNFAIP8L3                      |
| aof-miR394      | UUGGCAUUCUGUC<br>CACCUC    | 20                     | TLR4, IL6R, IL17RA, TNFAIP8,<br>TNFAIP1, TNFAIP3                |
| aof-miR166a     | UCUCGGACCAGGC<br>UUCAUUC   | 21                     | IL-6R                                                           |
| aof-miR396b     | UCCACAGCUUUC<br>UUGAACUG   | 21                     | TLR4, CHUK, TJP1(ZO-1),<br>IL6R, TNFAIP8, TNFAIP8L1,<br>TNFAIP1 |
| eun-miR482a-3p  | UCUUGCCAAUACC<br>ACCCAUGCC | 22                     | TLR4, IL6R, IL17RA, TNFAIP8,<br>TNFAIP3                         |
| ppt-miR894      | UUCACGUCGGGUU<br>CACCA     | 18                     | TLR4, IL6R                                                      |
| gma-miR1510b-5p | AGGGAUAGGUAA<br>AACAAUCU   | 19                     | TLR4, IL17RA, IL6ST                                             |

131 <sup>a</sup> Sequence information on human mRNAs was collected from the ensembl database  
 132 ([http://asia.ensembl.org/Homo\\_sapiens/Info/Index;](http://asia.ensembl.org/Homo_sapiens/Info/Index;)). Miranda (v3.3a) was used in predicting  
 133 potential human target genes of miRNAs of GENs sample.

134 TLR4: toll like receptor 4; MyD88: myeloid differentiation primary response gene 88;  
 135 NFKB1:nuclear factor kappa B subunit 1; CHUK: component of inhibitor of nuclear factor kappa  
 136 B kinase complex; IKBKB: inhibitor of nuclear factor kappa B kinase subunit beta; TJP1(ZO-1):  
 137 tight junction protein 1; IL-6R: interleukin 6 receptor; IL6ST: interleukin 6 signal transducer; IL-  
 138 1 $\beta$ : interleukin 1 beta; IL-17RA: interleukin 17 receptor A; IRAK3/4: interleukin 1 receptor  
 139 associated kinase 3/4; TNFAIP1/2/3/6/8: TNF alpha induced protein 1/2/3/6/8TNFAIP8L1: TNF  
 140 alpha induced protein 8 like 1; TNFAIP8L1/3: TNF alpha induced protein 8 like 1/3; IFNGR2:  
 141 interferon gamma receptor 2; IFN- $\gamma$ : interferon gamma

142 **Table S9.** The sequences of han-miR3630-5p mimic, negative control mimic, wild type  
 143 (WT) and mutant (MUT) of 3' UTR fragment of TLR4

| Name                   | Base sequences                                                                                                                                                                                                                                     |
|------------------------|----------------------------------------------------------------------------------------------------------------------------------------------------------------------------------------------------------------------------------------------------|
| han-miR-3630-5p mimic  | GCAAGUGAUGAAGAACCA<br>UGGUUCUUCAUCACUUGC                                                                                                                                                                                                           |
| negative control mimic | UCACAACCUCCUAGAAAGAGUAGA<br>UCUACUCUUUCUAGGAGGUUGUGA                                                                                                                                                                                               |
| TLR4-WT                | GAGCTCCTTTGAGGCTCAGGTCTTAATTCATGAAA<br>T<br>GGAGGTAATAATACCTTGTTGGCAGACCTCACTTG<br>G<br>TTAAAATGATAATGTTGATAGTTACAATAGTTACA<br>TT<br>TAATTGATCAATTGTTTTATGCTCGAG<br>GAGCTCCTTTGAGGCTCAGGTCTTAATTCATGAAA<br>T<br>GGAGGTAATAATACAGGTTTGGCAGAACGACAGG |
| TLR4-MUT               | T<br>GTTAAAATGATAATGTTGATAGTTACAATAGTTAC<br>AT<br>TTAATTGATCAATTGTTTTATGCTCGAG                                                                                                                                                                     |

144 Blue: putative han-miR-3630-5p binding sites in TLR4 3'UTR

145 Yellow: mutant han-miR-3630-5p binding sites in TLR4 3'UTR

146

147

- 
- <sup>1</sup> P. Palumbo, U. Picchini, B. Beck, J. van Gelder, N. Delbar and A. DeGaetano, A general approach to the apparent permeability index, *J. Pharmacokinet. Pharmacodyn.*, 2008, **35**, 235–248.
- <sup>2</sup> H. S. Cooper, S. N. Murthy, R. S. Shah and D. J. Sedergran, Clinicopathologic study of dextran sulfate sodium experimental murine colitis, *Lab Invest.*, 1993, **69**, 238–249.
- <sup>3</sup> F. Shen, J. Feng, X. Wang, Z. Qi, X. Shi, Y. An, Q. Zhang, C. Wang, M. Liu, B. Liu and L. Yu, Vinegar treatment prevents the development of murine experimental colitis via inhibition of inflammation and apoptosis, *J. Agric. Food Chem.*, 2016, **64**, 1111–1121.
- <sup>4</sup> a) C. Cao, B. Zhu, Z. Liu, X. Wang, C. Ai, G. Gong, M. Hu, L. Huang and S. Song, An arabinogalactan from *Lycium barbarum* attenuates DSS-induced chronic colitis in C57BL/6J mice associated with the modulation of intestinal barrier function and gut microbiota, *Food Funct.* 2021, **12**, 9829–9843. b) H. Hao, X. Zhang, L. Tong, Q. Liu, X. Liang, Y. Bu, P. Gong, T. Liu, L. Zhang, Y. Xia, L. Ai and H. Yi, Effect of extracellular vesicles derived from *Lactobacillus plantarum* Q7 on gut microbiota and ulcerative colitis in mice, *Front Immunol.* 2021, **12**, 777147. c) G. Huang, Z. Wang, G. Wu, R. Zhang, L. Dong, F. Huang, M. Zhang and D. Su, Lychee (*Litchi chinensis* Sonn.) pulp phenolics activate the short-chain fatty acid-free fatty acid receptor anti-inflammatory pathway by regulating microbiota and mitigate intestinal barrier damage in dextran sulfate sodium-induced colitis in mice, *J. Agric. Food Chem.*, 2021, **69**, 3326–3339.
- <sup>5</sup> S. Griffiths-Jones, The microRNA Registry, *Nucleic Acids Res.*, 2004, **32**, D109–111.
